# Supplementary material
Source: publisher figshare collection journal article supplement (https://tandf.figshare.com/articles/dataset/_/27203009)
Supplement: Supplementary file 1 [file 1]

**Table S1:** List of antibodies and reagents being used in this project.

| **Reagent or antibody** | **Article number** | **Company** | **Working concentration or dilution** |
| --- | --- | --- | --- |
| Rabbit-anti-PDGFRβ | #3169 | Cell Signaling Technology | 1:1000 |
| Goat-anti PDGFRβ | AF385 | RnD Systems | 1 μg/ml |
| Rabbit-anti-PDGFRβ CTβ |  | Homemade | 1:1000 |
| Mouse-anti-PDGFRβ-pY751 | #3166 | Cell Signaling Technology | 1:1000 |
| Rabbit-anti-PDGFRβ-pY579/581 |  | Homemade | 1:1000 |
| Rabbit-anti-Akt | #2920 | Cell Signaling Technology | 1:500 |
| Mouse-anti Akt-pS473 | #4060 | Cell Signaling Technology | 1:500 |
| Mouse-anti-Erk1/2 | #9107 | Cell Signaling Technology | 1:1000 |
| Rabbit-anti-Erk1/2-pT202/pY204 | #9101 | Cell Signaling Technology | 1:1000 |
| Mouse-anti-PLCγ | H00005335-M01 | Novus Biologicals | 1:1000 |
| Rabbit-anti-PLCγ-pY783 | #2821 | Cell Signaling Technology | 1:1000 |
| Mouse-anti-STAT3 | #9139 | Cell Signaling Technology | 1:1000 |
| Rabbit-anti-STAT3-pY | #9145 | Cell Signaling Technology | 1:500 |
| Mouse-anti-E-Cadherin | 610182 | BD Transduction Laboratories | 1:1000 |
| Rabbit-anti-N-Cadherin | #13116 | Cell Signaling Technology | 1:1000 |
| Rabbit-anti-fibronectin | F3648 | Sigma-Aldrich | 1:1000 |
| Mouse-anti-β-actin | ab8227 | Abcam | 1:1000 |
| Rabbit-anti-β-actin | sc47778 | Santa Cruz Biotechnology | 1:1000 |
| Mouse-anti-α-tubulin | ab7291 | Abcam | 1:5000 |
| Mouse-anti-α-tubulin | B-5-1-2, #T6074 | Sigma-Aldrich | 1:20,000 |
| Rabbit-anti-transferin receptor | NB100-92243 | Novus Biologicals | 1:1000 |
| Mouse-anti EEA1 | 610456 | BD transduction laboratories | 1:200 |
| Donkey-anti-goat-IRDye800CW | 926-32214 | LI-COR Biosciences | 1:10,000 |
| Donkey-anti-rabbit-IRDye800CW | 926-32213 | LI-COR Biosciences | 1:10,000 |
| Donkey-anti-mouse-IRDye800CW | 926-32212 | LI-COR Biosciences | 1:10,000 |
| Donkey-anti-mouse-AF680 | 926-68072 | Invitrogen | 1:10,000 |
| HRP-conjugated goat anti-mouse IgG | #62-6520 | Invitrogen | 1:10,000 |
| HRP-conjugated donkey anti-goat IgG | sc-2020 | Santa Cruz Biotechnology | 1:10,000 |
| Bortezomib | #2204 | Cell Signaling Technology | 500 nM |
| E-64 | **4545/1** | Santa Cruz Biotechnology | 10 μM |
| CA 074 | **4863/1** | Tocris Bioscience | 25 μM |
| L 006235 | **3066/10** | Tocris Bioscience | 10 μM |
| SID 026681509 | **3625/10** | Tocris Bioscience | 50 μM |
| β-Secretase Inhibitor IV | SS4562-1MG | Merck/Sigma-Aldrich | 1 μM |
| γ-Secretase Inhibitor IX | SCP0004-5MG | Merck/Sigma-Aldrich | 100 μM |
| γ -secretase inhibitor III | sc-302013 | Santa Cruz Biotechnology | 50 μM |
| Dyngo-4A | S7163 | Selleckchem | 30 μM |
| BAPTA AM | B1205 | Themo Scientific | 100 μM |
| EDTA | ED4SS | Sigma-Aldrich | 2 mM |
| Chloroquine | C6628 | Sigma-Aldrich | 25 μM |
| bafilomycin A1 | 11038 | Cayman Chemicals | 50 nM |
| cycloheximide | C7698 | Sigma-Aldrich | 50 μM |
| Dulbecco’s Modified Eagle’s Medium (DMEM) | 41965120 | Thermo Scientific |  |
| Minimum Essential Medium Eagle (MEM) | M5650 | Sigma-Aldrich |  |
| Glutamax | 35050061 | Thermo Scientific |  |
| L-Glutamine | 25030-081 | Gibco | 2 mM |
| Fetal bovine serum (FBS) | 10437-028 | Gibco | 10% |
| Human primary foreskin fibroblasts | AG01523 | Coriell Cell Repositories |  |
